# Supplementary material for: Comparative Study of the Gut Microbiota Community between the Farmed and Wild Mastacembelus armatus (Zig-Zag Eel)
Source: MDPI journal article supplement (doi:10.3390/metabo12121193), 2022-11-29
Supplement: s1 [file s1]

**Table S1.** The composition of the gut microbiota in the cultivated and wild zig-zag eels

|    | phylum | Class | order | family | genus |
|----|--------|-------|-------|--------|-------|
| BF | 5      | 7     | 13    | 27     | 40    |
| BM | 11     | 28    | 43    | 82     | 115   |
| BR | 11     | 15    | 26    | 53     | 75    |
| WF | 28     | 61    | 108   | 210    | 378   |
| WM | 26     | 62    | 111   | 213    | 418   |
| WR | 31     | 66    | 115   | 230    | 486   |
